# Supplementary material
Source: publisher figshare collection journal article supplement (https://sage.figshare.com/ndownloader/files/30778907)
Supplement: Supplementary file 1 [file 30778907]

**Supplemental Table 1. Keywords used to code the reason for seeking medical cannabis.**

| **Categories** | **Keywords** |
| --- | --- |
| Pain | Ache, carpal tunnel, carpel tunnel, cbp, ddd, degenerative disc, disc herniation, endometriosis, fibro, fracture, headache, herniated dis, injury, lbp, migrane, migraine, mva, mvc, myalgia, neuralgia, pain, radiculopa, sciatica, scoliosis, spasm, spina bif, spinal stenosis, spondylo, spondylitis, strain, tendin, tendon |
| Mental Health | Any keywords from the mental health subcategories as well as, add, adhd, ocd, schizo, stress |
| Anxiety | Anxiety, gad |
| Depression | Depression, depressive, mdd |
| Post-traumatic  Stress Disorder | Post traumatic stress disorder, ptsd |
| Bipolar | Bipolar, bi-polar |
| Panic Disorder | Panic |
| Mood Disorder | Mood |
| Autoimmune | Ankylosing spond, ankylosis spond, arthral, arthrit, ibs, irritable bowel, lupus, ms, multiple sclerosis, oa, osteoarthrit, ra, rheumatoid, sjogren |
| Cancer | ca , cancer, carcinoma, glioblastoma, leukemia, lymphoma, malignant, melanoma, metastatic, myeloma, sarcoma, tumor, tumour |
| Sleep problems | Fatigue, insomnia, sleep, apnea |
| Neurological | Als, cerebral palsy, epilepsy, neuropathy, Parkinson, restless leg, seizure, tremor |
| Gastrointestinal | Chrohn, chron, colitis, crohn, ibs, irritable bowel |
| Other | Appetite, Asperger, autism, autistic, concussion, copd, diabet, glaucoma, huntington, nausea, osteop |
| Uncategorized | Did not contain any of the above keywords |

**Supplemental Table 2. Timing of follow-up appointments for all appointments where GAD-7 was reassessed with mean difference in GAD-7 score for each time period (n=5732).**

| **Follow-up Appointment Time** | **N (%)** | **Mean Difference in GAD-7 Score. Mean (95% CI)** | **p-value** |
| --- | --- | --- | --- |
| ≤7 days | 629 (11.0) | 0.10 (0.001, 0.20) | 0.046 |
| 1 week-3 months | 1,361 (23.7) | -0.27 (-0.38, -0.16) | <0.001 |
| 3-6 months | 819 (14.3) | -0.34 (-0.49, -0.19) | <0.001 |
| 6-12 months | 1,090 (19.0) | -0.50 (-0.67, -0.34) | <0.001 |
| 1-2 years | 1,367 (23.8) | -0.34 (-0.47, -0.21) | <0.001 |
| >2 years | 466 (8.1) | -0.21 (-0.42, -0.01) | 0.037 |

**Supplemental Table 3. Changes in GAD-7 scores from initial to final testing for all followed-up patients and by initial anxiety level classification (n=5075)**

| **Change in GAD-7 Score** | **N (%)** | | | | |
| --- | --- | --- | --- | --- | --- |
| **All Patients** | **Severe** | **Moderate** | **Mild** | **None** |
| -20 | 1 (0.02) | 1 (0.07) | - | - | - |
| -19 | 3 (0.06) | 3 (0.22) | - | - | - |
| -18 | 1 (0.02) | 1 (0.07) | - | - | - |
| -17 | 5 (0.1) | 5 (0.37) | - | - | - |
| -16 | 3 (0.06) | 3 (0.22) | - | - | - |
| -15 | 5 (0.1) | 5 (0.37) | - | - | - |
| -14 | 8 (0.16) | 8 (0.59) | - | - | - |
| -13 | 6 (0.12) | 4 (0.30) | 2 (0.21) | - | - |
| -12 | 5 (0.1) | 2 (0.15) | 3 (0.31) | - | - |
| -11 | 10 (0.2) | 6 (0.44) | 4 (0.41) | - | - |
| -10 | 13 (0.26) | 5 (0.37) | 8 (0.83) | - | - |
| -9 | 14 (0.28) | 2 (0.15) | 10 (1.04) | 2 (0.17) | - |
| -8 | 18 (0.35) | 6 (0.44) | 7 (0.73) | 5 (0.41) | - |
| -7 | 12 (0.24) | 3 (0.22) | 4 (0.41) | 5 (0.41) | - |
| -6 | 20 (0.39) | 4 (0.30) | 8 (0.83) | 8 (0.66) | - |
| -5 | 28 (0.55) | 8 (0.59) | 7 (0.73) | 13 (1.08) | - |
| -4 | 36 (0.71) | 6 (0.44) | 10 (1.04) | 13 (1.08) | 7 (0.45) |
| -3 | 32 (0.63) | 2 (0.15) | 5 (0.52) | 13 (1.08) | 12 (0.78) |
| -2 | 43 (0.85) | 8 (0.59) | 11 (1.14) | 11 (0.91) | 13 (0.84) |
| -1 | 43 (0.85) | 6 (0.44) | 5 (0.52) | 17 (1.41) | 15 (0.97) |
| 0 | 4607 (90.78) | 1254 (92.55) | 857 (88.81) | 1,085 (89.74) | 1411 (91.27) |
| 1 | 45 (0.89) | 6 (0.44) | 5 (0.52) | 7 (0.58) | 27 (1.75) |
| 2 | 34 (0.67) | 4 (0.30) | 8 (0.83) | 11 (0.91) | 11 (0.71) |
| 3 | 19 (0.37) | 2 (0.15) | 2 (0.21) | 5 (0.41) | 10 (0.65) |
| 4 | 20 (0.39) | 1 (0.07) | 3 (0.31) | 5 (0.41) | 11 (0.71) |
| 5 | 6 (0.12) | - | 2 (0.21) | - | 4 (0.26) |
| 6 | 7 (0.14) | - | - | 2 (0.17) | 5 (0.32) |
| 7 | 4 (0.08) | - | - | - | 4 (0.26) |
| 8 | 7 (0.14) | - | 1 (0.10) | 2 (0.17) | 4 (0.26) |
| 9 | 7 (0.14) | - | 3 (0.31) | 1 (0.08) | 3 (0.19) |
| 10 | 5 (0.1) | - | - | 1 (0.08) | 4 (0.26) |
| 11 | 4 (0.08) | - | - | 2 (0.17) | 2 (0.13) |
| 12 | 2 (0.04) | - | - | - | 2 (0.13) |
| 14 | 1 (0.02) | - | - | - | 1 (0.06) |
| 15 | 1 (0.02) | - | - | 1 (0.08) | - |
| **P-value** | <0.0001 | <0.0001 | <0.0001 | 0.0003 | <0.0001 |

**Supplemental Table 4. Multiple linear regression to predict the change in GAD-7 score at follow-up.**

| Variable | Coefficient | Std. Error | t | P-value |
| --- | --- | --- | --- | --- |
|  |  |  |  |  |
| Initial GAD-7 Score | -0.046 | 0.004 | -10.58 | <0.001 |
| Follow-up Time | -0.0003 | 0.0001 | -3.12 | 0.002 |
| Anxietya | -0.201 | 0.073 | -2.76 | 0.006 |
| Depressiona | 0.331 | 0.085 | 3.91 | <0.001 |
| Paina | -0.152 | 0.066 | -2.31 | 0.021 |
| Sleep Disordera | 0.232 | 0.076 | 3.06 | 0.002 |

a reason for seeking cannabis

**Supplemental Table 5. Simple linear regression to predict the change in GAD-7 score at follow-up.**

| Variable | Coefficient | Std. Error | t | p-value |
| --- | --- | --- | --- | --- |
| Sex | 0.040 | 0.056 | 0.72 | 0.471 |
| Age | 0.003 | 0.002 | 1.58 | 0.115 |
| Quintile (Ref: Quintile 1) |  |  |  |  |
| 2 | -0.075 | 0.090 | -0.83 | 0.406 |
| 3 | -0.021 | 0.087 | -0.24 | 0.813 |
| 4 | -0.094 | 0.083 | -1.14 | 0.256 |
| 5 | -0.603 | 0.092 | -6.53 | <0.001 |
| Initial GAD-7 Score | -0.046 | 0.004 | -11.14 | <0.001 |
| Length of Follow-Up (days) | 0.000 | 0.000 | -2.27 | 0.023 |
| Pain | 0.288 | 0.075 | 3.84 | <0.001 |
| Mental Health | -0.206 | 0.057 | -3.59 | <0.001 |
| Anxiety | -0.320 | 0.065 | -4.9 | <0.001 |
| Depression | -0.008 | 0.078 | -0.1 | 0.92 |
| Post-traumatic Stress Disorder | -0.351 | 0.152 | -2.32 | 0.021 |
| Bipolar | 0.010 | 0.215 | 0.05 | 0.962 |
| Panic Disorder | -0.326 | 0.161 | -2.03 | 0.042 |
| Mood Disorder | -0.251 | 0.154 | -1.63 | 0.104 |
| Autoimmune | 0.113 | 0.064 | 1.76 | 0.079 |
| Cancer | 0.181 | 0.102 | 1.78 | 0.076 |
| Sleep problems | -0.197 | 0.066 | -2.98 | 0.003 |
| Neurological | 0.004 | 0.104 | 0.04 | 0.97 |
| Gastrointestinal | -0.078 | 0.123 | -0.63 | 0.526 |
| Other | 0.051 | 0.074 | 0.69 | 0.491 |
| Uncategorized | -0.044 | 0.136 | -0.32 | 0.749 |
